# Supplementary material
Source: publisher figshare collection journal article supplement (https://acs.figshare.com/ndownloader/files/9783025)
Supplement: Supplementary file 1 [file 9783025]

## Sheet: Supple.Table 2
Supple.Table 2: The relative abundances, coefficient of variations (CV) and the raw intensities of quantified histone peptides on H3 and H4 in the four cell lines.
	AVG relative abundance				CV				AVG Intensity
Peptide	Hela	Myoblasts	hESCs	293T	Hela	Myoblasts	hESCs	293T	Hela	Myoblasts	hESCs	293T
H3_3_8 unmod	0.876572	0.817525	0.899167	0.889641	0.0244027	0.091174	0.0330367	0.0148994	1.60339e+11	1.27536e+11	2.34381e+11	1.71996e+11
H3_3_8 K4me1	0.0852519	0.10883	0.0827688	0.0881413	0.202586	0.59075	0.332155	0.132761	16664063650	2.82971e+10	3.43721e+10	1.87886e+10
H3_3_8 K4me2	0.0315462	0.0212232	0.0106381	0.0144051	0.259212	0.25463	0.186011	0.338809	3.97977e+09	3.11085e+09	2.55133e+09	1.7695e+09
H3_3_8 K4me3	0.003618	0.00481993	0.004002	0.00545807	0.793523	0.355591	0.293525	0.256346	4.23699e+08	5.11969e+08	1.22264e+09	8.61243e+08
H3_3_8 K4ac	0.00301193	0.0476019	0.00342379	0.00235414	0.497967	0.688692	1.26585	0.858316	8.76978e+08	9.15577e+09	2.47163e+09	1.16785e+09
H3_9_17 unmod	0.123734	0.0908185	0.204853	0.105528	0.264301	0.115923	0.231131	0.308383	3.71751e+10	3.48774e+10	9.92963e+10	3.5158e+10
H3_9_17 K9me1	0.0626339	0.0624663	0.0614218	0.0391471	0.247443	0.054521	0.312735	0.356403	1.78867e+10	2.2888e+10	44124109345	1.96068e+10
H3_9_17 K9me2	0.233251	0.318903	0.277249	0.339119	0.0903148	0.0654849	0.189339	0.130348	9.7005e+10	1.03989e+11	1.31765e+11	157392335135
H3_9_17 K9me3	0.134286	0.223411	0.172	0.160074	0.06006	0.0524943	0.225978	0.231381	5.21215e+10	7.47575e+10	1.02955e+11	1.06583e+11
H3_9_17 K9ac	0.105515	0.0411808	0.0682754	0.0406719	0.0905269	0.12892	0.349283	0.28682	3.9325e+10	1.6066e+10	36299066490	21320577235
H3_9_17 K14ac	0.0117181	0.00878993	0.0235851	0.021246	0.386378	0.205057	0.92066	1.00855	4.25242e+09	2.87235e+09	7.64906e+09	1.98674e+09
H3_9_17 K9me1K14ac	0.0565403	0.0298716	0.0321526	0.0334009	0.118235	0.0941646	0.272597	0.685347	20476310350	1.13371e+10	1.88436e+10	1.1672e+10
H3_9_17 K9me2K14ac	0.203858	0.142168	0.106545	0.194408	0.12964	0.0655719	0.246212	0.19102	8.59323e+10	5.04403e+10	4.63299e+10	7.77616e+10
H3_9_17 K9me3K14ac	0.0581933	0.072922	0.0275469	0.0538939	0.23059	0.13255	0.147587	0.295922	2.65817e+10	2.82696e+10	1.54861e+10	3.50793e+10
H3_9_17 K9acK14ac	0.0102699	0.00946807	0.0263711	0.0125108	0.370279	0.204337	1.37341	1.01864	3.02066e+09	3.38315e+09	5.69404e+10	3.82186e+09
H3_18_26 unmod	0.67253	0.763606	0.702921	0.636577	0.086279	0.070669	0.0899467	0.0871078	127952289500	1.13847e+11	1.88816e+11	1.37357e+11
H3_18_26 K23me1	0.00260929	0.00686321	0.00548743	0.0087485	0.477157	0.375729	0.897248	0.98596	7.11575e+08	1.28326e+09	1.33456e+09	4.57509e+08
H3_18_26 K18me1	0.00353564	0.00291736	0.0123868	0.0265184	0.983498	0.473266	1.19854	1.1248	3.48588e+08	3.37651e+08	9.90906e+08	4.24862e+08
H3_18_26 K18me1K23me1	0.0239614	0.00212593	0.00893364	0.0194699	2.15624	0.361323	1.22289	1.50611	4.88178e+08	271697030	516559345	3.70735e+08
H3_18_26 K18ac	0.0789536	0.0605394	0.067638	0.0749001	0.314716	0.29608	0.30375	0.221595	2.03485e+10	1.20926e+10	2.59755e+10	16381939145
H3_18_26 K23ac	0.194461	0.152528	0.160486	0.205219	0.164515	0.227681	0.0971536	0.119832	4.44535e+10	2.92199e+10	4.81709e+10	4.90984e+10
H3_18_26 K18acK23ac	0.0239493	0.0114206	0.0421477	0.0285681	0.189359	0.343223	0.996048	1.25754	5.64162e+09	2.31333e+09	6.05018e+09	1.49345e+09
H3_27_40 unmod	0.512483	0.0858747	0.212806	0.19726	0.339429	0.337202	0.476599	1.02909	7.92739e+10	7.47324e+09	3.61363e+09	8.00401e+09
H3_27_40 K36me1	0.0344343	0.00626	0.0173701	0.0105344	1.37431	0.847611	0.658974	0.91254	1.54309e+09	4.51199e+08	5.8657e+09	5.61981e+08
H3_27_40 K27me1	0.0207528	0.0101733	0.0181107	0.0248026	0.77385	0.427763	0.348837	1.25782	8.98988e+08	5.5042e+08	3.45468e+09	1.004e+09
H3_27_40 K27me2	0.0594574	0.0846148	0.0731269	0.0540317	0.3493	0.308627	0.623206	0.431076	5.25736e+09	7.63266e+09	7.76551e+09	10435288690
H3_27_40 K36me2	0.0792588	0.047845	0.0459081	0.0369046	0.499808	0.582259	0.513024	1.32948	5.16076e+09	7.59372e+09	3.97103e+09	9.50995e+08
H3_27_40 K27me3	0.0034275	0.0234016	0.0268032	0.0192561	1.02732	0.953724	1.22619	1.31429	8.50007e+08	1.87148e+09	1.67602e+09	1.31107e+10
H3_27_40 K36me3	0.0168216	0.0213736	0.0144497	0.0177218	0.714596	0.866213	0.586024	0.571285	3.28992e+09	3.07524e+09	1.21415e+09	6.01355e+09
H3_27_40 K27me2K36me1	0.0360479	0.072934	0.0237579	0.0292578	0.736214	0.493292	0.572922	1.16964	1.79785e+09	8.34541e+09	2.61353e+09	1.98504e+10
H3_27_40 K27me1K36me2	0.00323964	0.0596334	0.0622154	0.0392264	1.45076	0.733227	0.844631	0.778002	2.08907e+09	8.4037e+09	2.5598e+10	4.63157e+09
H3_27_40 K27me1K36me1	0.0439949	0.0296314	0.0855037	0.0758694	1.08458	0.488873	0.775379	0.92006	1.89021e+09	1.7043e+09	5.08855e+09	1.28433e+09
H3_27_40 K27me3K36me1	0.00210343	0.107197	0.143965	0.305345	1.51034	1.16356	0.894262	1.00373	1.12738e+09	4.86179e+09	4.27492e+09	4.39214e+10
H3_27_40 K27me1K36me3	0.0573907	0.0939348	0.0995069	0.0639689	2.6455	0.975189	0.560913	0.971287	4.05216e+10	7.19358e+09	4.76328e+09	1.72361e+09
H3_27_40 K27me2K36me2	0.055355	0.226618	0.0787754	0.0791821	0.715734	0.268472	0.966296	0.956849	1.15802e+10	2.36503e+10	2.14458e+10	4.08508e+10
H3_27_40 K27me3K36me2	0.0163551	0.0499399	0.0450889	0.0193771	0.716179	0.318185	1.61378	1.02571	2.45384e+09	4.44312e+09	2.58672e+09	4.22918e+09
H3_27_40 K27ac	0.0588785	0.0805683	0.0526116	0.0272614	0.692456	0.596676	0.899049	1.04776	2.95193e+09	7.55887e+09	2.47108e+10	4.33444e+09
H33_27_40 unmod	0.0294494	0.0235017	0.0314353	0.0163922	0.51001	0.56402	0.755849	1.14254	666000955	1.32993e+09	3.34399e+09	5.85821e+08
H33_27_40 K36me1	0.0283753	0.0110559	0.0378676	0.0115404	0.42292	0.751947	0.583084	0.59746	9.70736e+08	4.73995e+08	4.55023e+09	4.64297e+08
H33_27_40 K27me1	0.0970767	0.0274216	0.0627209	0.0256586	0.379152	0.676659	0.846889	0.7822	4.63353e+09	1.36994e+09	2987060065	8.48083e+08
H33_27_40 K27me2	0.100229	0.184961	0.0851704	0.0605294	0.628834	0.575449	0.590393	0.365821	7.00564e+09	1.21099e+10	1.02417e+10	1.10009e+10
H33_27_40 K36me2	0.0618574	0.117151	0.0497259	0.0535664	0.653409	0.37641	1.00627	0.581701	1.44409e+09	6.35405e+09	8.14181e+09	1.8014e+10
H33_27_40 K27me3	0.0605014	0.0896556	0.0631431	0.1649	1.66574	1.04067	1.55081	0.529088	6.57004e+09	3.42189e+09	4.6124e+09	4.17406e+10
H33_27_40 K36me3	0.0611472	0.130147	0.145724	0.156531	0.834413	0.972998	0.885459	1.07827	9.91462e+09	3.55603e+09	2.39826e+10	3.05093e+10
H33_27_40 K27me2K36me1	0.0481151	0.134058	0.0988874	0.139832	0.728135	0.58268	0.882116	0.644118	3275720960	3.96875e+09	26976161641	1.37962e+10
H33_27_40 K27me1K36me2	0.0465766	0.0640446	0.09352	0.0663903	2.64324	0.396962	1.66962	1.14158	4.29552e+09	2.82969e+09	3.85926e+09	1.02547e+10
H33_27_40 K27me1K36me1	0.106563	0.0211142	0.0543099	0.0895868	0.981608	0.47093	1.14325	1.34974	1.39359e+09	5.8481e+08	4.65964e+08	4.81934e+08
H33_27_40 K27me3K36me1	0.0729746	0.0160174	0.0605194	0.0286679	1.09413	0.868907	1.10241	1.0433	1082074125	9.67391e+08	2.87885e+09	4.53526e+08
H33_27_40 K27me1K36me3	0.00430921	0.0220799	0.0385072	0.0247684	2.53048	0.314551	0.734865	1.00476	3.29408e+08	990058700	1.34245e+09	1.49605e+09
H33_27_40 K27me2K36me2	0.00887629	0.00769143	0.0109781	0.0258331	1.43861	0.755245	1.00068	1.20286	1.19356e+08	4.37036e+08	2.99098e+09	2.07041e+10
H33_27_40 K27me3K36me2	0.124381	0.0933824	0.116211	0.0902856	0.653097	0.621256	0.62261	0.63764	6.68898e+09	3.96286e+09	4.45695e+10	7.31222e+09
H33_27_40 K27ac	0.149567	0.0577184	0.0512796	0.0455172	0.810877	0.939216	1.03689	0.96732	1.56958e+10	1.20668e+09	2.99529e+09	7.23456e+09
H3_54_63 unmod	0.215505	0.384491	0.355294	0.304747	0.359941	0.2317	0.206375	0.341301	1.57795e+09	1.96988e+09	2576512980	2.93546e+09
H3_54_63 K56me1	0.263955	0.1357	0.190657	0.236854	0.520226	0.256425	0.471662	0.641473	1.22804e+09	6.63954e+08	1.34774e+09	7.37324e+08
H3_54_63 K56me2	0.105191	0.0806099	0.0711297	0.111492	0.899638	0.320765	0.85339	0.695767	924421325	3.88902e+08	2.31317e+08	2.03911e+08
H3_54_63 K56me3	0.195631	0.217337	0.206735	0.227703	0.438777	0.251472	0.308942	0.299844	1.2248e+09	1.35497e+09	1.39426e+09	8.70687e+08
H3_54_63 K56ac	0.219718	0.181863	0.176184	0.119204	0.477781	0.329388	0.461355	0.342722	1.66831e+09	1.11145e+09	1.32565e+09	679424725
H3_73_83 unmod	0.0707649	0.114803	0.23942	0.33302	0.66489	0.401945	0.553874	0.320207	7.2262e+08	1.53186e+09	2.5941e+09	1.60648e+09
H3_73_83 K79me1	0.0657717	0.0770904	0.195095	0.178478	1.228	0.829797	0.239238	0.444509	4.90148e+08	3.5113e+08	1388749695	2433834945
H3_73_83 K79me2	0.262751	0.570185	0.0350098	0.0135324	0.84191	0.302652	0.525156	0.547123	3.70136e+09	5.97444e+09	2.27792e+08	5.24347e+07
H3_73_83 K79me3	0.415702	0.182105	0.361511	0.322726	0.567812	0.78052	0.388201	0.317847	3.25544e+09	2.27277e+09	3.2578e+09	6844514510
H3_73_83 K79ac	0.18501	0.0558176	0.168964	0.152244	0.47009	0.676794	1.02625	0.518857	1892522950	497904275	1.90385e+09	8.15527e+09
H3_117_128 unmod	0.770345	0.786867	0.731554	0.572997	0.287238	0.166384	0.34903	0.289887	5.46217e+09	6.87732e+09	7.52483e+09	5980031167
H3_117_128 K122ac	0.229655	0.213133	0.268446	0.427003	0.981277	0.614276	0.951159	0.389	4.49617e+08	1.4695e+09	2.31737e+08	1.97104e+09
H4_4_17 unmod	0.603912	0.640208	0.510227	0.496504	0.186696	0.208559	0.212516	0.141347	6.75187e+10	5.89381e+10	65611441675	3.32207e+10
H4_4_17 K5ac	0.0538364	0.0599154	0.0586982	0.0959347	0.603425	0.612886	0.601868	0.17989	1.01543e+10	9356264330	1.30573e+10	5.04852e+09
H4_4_17 K8ac	0.0126506	0.0110569	0.0157842	0.0163898	0.545098	0.816179	0.642735	0.411454	2.4512e+09	1.99105e+09	2.82019e+09	1.11503e+09
H4_4_17 K12ac	0.0252114	0.0260178	0.020634	0.027371	0.709044	0.681047	0.699264	0.260022	4.96542e+09	3.90668e+09	8.69076e+09	2.04169e+09
H4_4_17 K16ac	0.10127	0.0951248	0.0943186	0.165788	0.57915	0.551561	0.601965	0.204976	2.14129e+10	1.37822e+10	2.26823e+10	12742830125
H4_4_17 K5acK8ac	0.0179936	0.008628	0.0327799	0.0209921	0.348093	0.371183	0.457574	0.560492	1.91227e+09	6.18814e+08	1.94829e+09	6.21237e+08
H4_4_17 K5acK12ac	0.0123625	0.00377629	0.0160256	0.00813321	0.340462	0.48484	0.529157	0.604505	1247173210	2.09167e+08	1.14354e+09	2.63553e+08
H4_4_17 K5acK16ac	0.00503414	0.00217386	0.00493271	0.00174857	0.483198	0.410023	0.519053	0.539245	8.98102e+08	2.6096e+08	7.63304e+08	1.99032e+08
H4_4_17 K8acK12ac	0.00284936	0.002034	0.00577914	0.004859	0.580671	0.539776	0.266327	0.734566	3.30589e+08	9.46141e+07	4.75813e+08	1.18952e+08
H4_4_17 K8acK16ac	0.0105514	0.00499071	0.0154217	0.00891193	0.288822	0.346861	0.261221	0.481642	1.2818e+09	4.35365e+08	2.02e+09	4.40304e+08
H4_4_17 K12acK16ac	0.0318054	0.0136265	0.0404733	0.0257022	0.213477	0.280728	0.247567	0.485515	3.83768e+09	1.14203e+09	4.14674e+09	8.63283e+08
H4_4_17 K5acK8acK12ac	0.00960764	0.0051645	0.0198002	0.0127024	0.317394	0.978089	0.736877	1.00678	1079102485	4.30289e+08	7.23575e+08	1.82992e+08
H4_4_17 K5acK8acK16ac	0.00364343	0.00116586	0.00330529	0.00229621	0.155046	0.671834	0.459259	0.707552	428502375	1.10232e+08	3.71889e+08	9.03144e+07
H4_4_17 K5acK12acK16ac	0.00430036	0.000661643	0.00405714	0.00191071	0.150666	0.462498	0.5186	0.502521	514756605	5.18994e+07	3.50667e+08	7.41478e+07
H4_4_17 K8acK12acK16ac	0.0197508	0.00827836	0.0305489	0.0171874	0.1981	0.884542	0.427471	0.949592	2.47445e+09	7.43639e+08	2.15874e+09	3.97905e+08
H4_4_17 K5acK8acK12acK16ac	0.0852203	0.117177	0.127214	0.0935686	0.195122	0.463285	0.4964	0.539166	1.24998e+10	15941898150	1.20593e+10	9.58877e+09
H4_20_23 unmod	0.21272	0.316368	0.40076	0.345336	0.448483	0.506292	0.277632	0.322543	2.87471e+08	2.44056e+08	2.91744e+08	2.4111e+08
H4_20_23 K20me1	0.6533	0.517772	0.499257	0.550675	0.257746	0.118983	0.180297	0.214815	723029200	8.62947e+08	5.89531e+08	5.54041e+08
H4_20_23 K20me2	0.0335366	0.0960555	0.00917179	0.0147974	1.40552	1.75749	1.41341	1.06453	1.02895e+08	4.55135e+08	24967589	3.55656e+06
H4_20_23 K20me3	0.0232996	0.0174326	0.0135036	0.0171611	1.07006	0.811736	1.16888	0.73643	4.3183e+07	2.21185e+07	3.60538e+07	9.73111e+06
H4_20_23 K20ac	0.0771433	0.0523716	0.0773076	0.0720303	1.17729	0.932678	0.415682	0.445624	2.59204e+08	1.48674e+08	9.09e+07	6.41988e+07
